# Supplementary material for: Impact of onions in tomato-based sauces on isomerization and bioaccessibility of colorless carotenes: phytoene and phytofluene
Source: Royal Society of Chemistry journal article supplement (doi:10.1039/d0fo00505c), 2020-01-01
Supplement: d0fo00505c1.pdf [file d0fo00505c1.pdf]

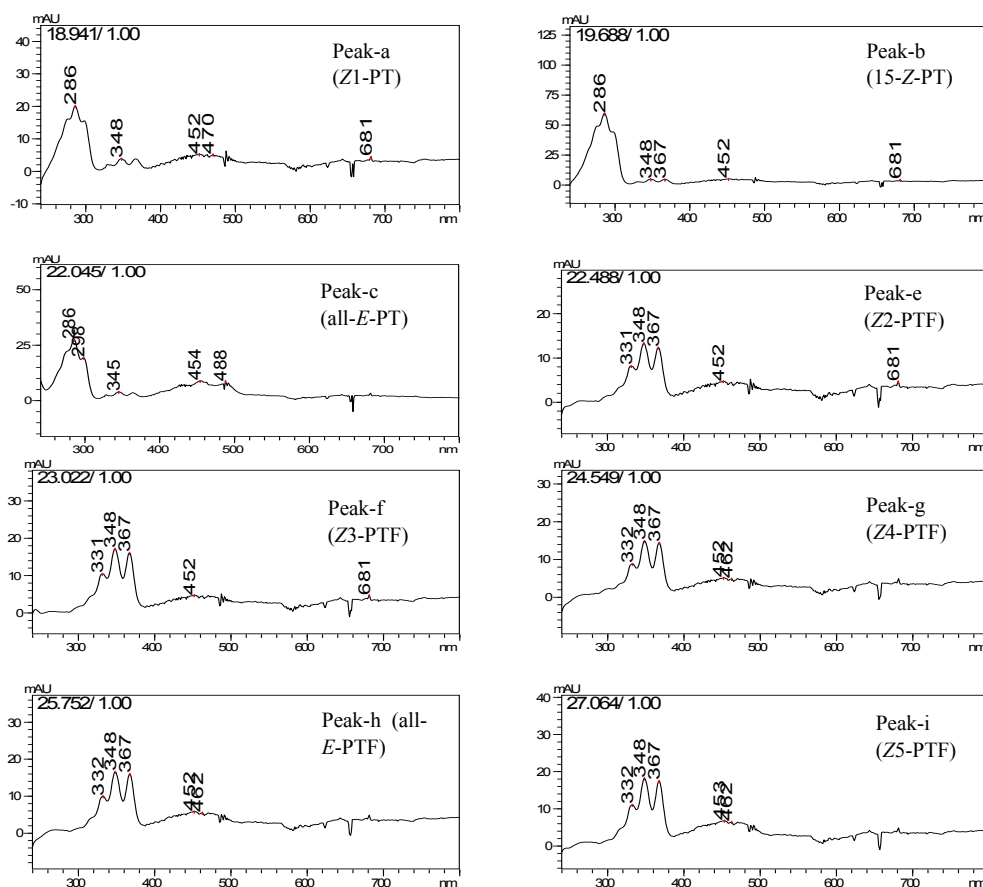

Fig. S1. The spectra in the mobile phase of the main geometric isomers of phytoene (PT) and phytofluene (PTF)

Table S1. Preparations of tomato-EVOO-onion sauces with different proportion of three ingredients cooking in microwave oven at 600 W for 5 min

|                                             | Tomato (HB or CB) (g) | EVOO (g) | Onion (g) |
|---------------------------------------------|-----------------------|----------|-----------|
| HB-E <sub>2.5%</sub> (S1)                   | 48.75                 | 1.25     | 0.00      |
| HB-E <sub>2.5%</sub> -O <sub>5%</sub> (S2)  | 46.25                 | 1.25     | 2.50      |
| HB-E <sub>2.5%</sub> -O <sub>10%</sub> (S3) | 43.75                 | 1.25     | 5.00      |
| HB-E <sub>2.5%</sub> -O <sub>20%</sub> (S4) | 38.75                 | 1.25     | 10.00     |
| CB-E <sub>2.5%</sub> (S5)                   | 48.75                 | 1.25     | 0.00      |
| CB-E <sub>2.5%</sub> -O <sub>5%</sub> (S6)  | 46.25                 | 1.25     | 2.50      |
| CB-E <sub>2.5%</sub> -O <sub>10%</sub> (S7) | 43.75                 | 1.25     | 5.00      |
| CB-E <sub>2.5%</sub> -O <sub>20%</sub> (S8) | 38.75                 | 1.25     | 10.00     |

EVOO: extra virgin olive oil;

HB-E<sub>t%</sub>-O<sub>m%</sub>: hot break tomato puree-t% EVOO-m% onion puree; CB-E<sub>t%</sub>-O<sub>m%</sub>: cold break tomato puree-t% EVOO-m% onion puree

### ***Onion puree, potato puree, and minced beef meat preparations***

Fresh onion was first carefully washed and peeled, then peeled onion was cut into small pieces, mixed with a blender for onion puree. Potatoes were boiled in tap water, peeled and hand pureed. Beef meat (5% fat) was medium fried in a frying pan without added fat and then minced. The onion purees were used to make the tomato-based sauce; however, the potato purees and minced beef meats were for preparation of meals as macronutrients used in *in vitro* digestion experiments. The proportions of each macronutrient found in the tested meals are close to the US dietary reference intakes (DRI). All samples were frozen and stored at -20°C until processing. Prior to sample processing, these samples were thawed overnight at 4°C.

### ***Preparations of tomato-onion-EVOO sauces***

Three components (tomato puree (HB and CB), onion puree (0, 5, 10, and 20%) and EVOO (2.5 %) were weighted and mixed following Table S1. For CB with diallyl disulfide (DADS) sauce, DADS was added directly to CB puree, and final concentrations of EVOO and DADS in the puree were adjusted to 2.5% and 0.50 mg/g puree, respectively. Then the purees in beakers (250 mL) were put into a microwave oven and heating at 600 W for 5 min. Every time, four beakers with the samples (each one 50 g) were uniformly put into the microwave oven. After heating, the prepared sauces were immediately cooled in ice water and stored at -20°C until analysis. Two types of tomato-EVOO-onion sauces (HB-EVOO-onion (HB-E-O), (CB-EVOO-onion (CB-E-O)) were prepared.

Table S2. Proportion (%) of phytoene (PT) and phytofluene (PTF) in tomato-based sauces

|                                        | Phytoene (PT) |            |                   | Phytofluene (PTF) |            |            |                    |            |
|----------------------------------------|---------------|------------|-------------------|-------------------|------------|------------|--------------------|------------|
|                                        | Z1-PT         | 15-Z-PT    | all- <i>E</i> -PT | Z1-PTF            | Z2,3-PTF   | Z4-PTF     | all- <i>E</i> -PTF | Z5-PTF     |
| HB-E <sub>2.5%</sub>                   | n.d           | 98.6±0.1a  | 1.4±0.1a          | n.d               | 77.3±0.7a  | n.d        | 20.7±0.8a          | 2.1±0.1a   |
| HB-E <sub>2.5%</sub> -O <sub>5%</sub>  | 0.6±0.2a      | 91.7±0.2ab | 7.7±0.0ab         | 1.0±0.0a          | 38.3±0.8ab | 8.4±0.3a   | 32.1±0.3b          | 20.2±0.2ab |
| HB-E <sub>2.5%</sub> -O <sub>10%</sub> | 1.2±0.1ab     | 88.0±0.9bc | 10.8±0.8bc        | 1.3±0.3a          | 33.7±1.8bc | 11.4±0.6ab | 28.9±0.2bc         | 24.8±1.2bc |
| HB-E <sub>2.5%</sub> -O <sub>20%</sub> | 1.8±0.0b      | 84.7±0.0c  | 13.5±0.1c         | 1.5±0.1a          | 29.9±0.2c  | 14.2±0.1b  | 26.2±0.3ac         | 28.2±0.3c  |
| CB-E <sub>2.5%</sub>                   | n.d           | 98.7±0.0a  | 1.3±0.0a          | n.d               | 80.1±0.7a  | n.d        | 18.3±0.7a          | 1.6±0.0a   |
| CB-E <sub>2.5%</sub> -O <sub>5%</sub>  | n.d           | 91.7±0.1ab | 8.3±0.1ab         | 1.2±0.1a          | 36.1±0.7ab | 10.5±0.2a  | 28.6±0.1b          | 23.6±0.5ab |
| CB-E <sub>2.5%</sub> -O <sub>10%</sub> | 1.7±0.0a      | 86.0±0.0bc | 12.3±0.1bc        | 1.5±0.0ab         | 31.0±0.3bc | 13.1±0.1ab | 26.7±0.1bc         | 27.7±0.1bc |
| CB-E <sub>2.5%</sub> -O <sub>20%</sub> | 3.7±0.1a      | 78.2±0.4c  | 18.1±0.3c         | 1.8±0.0b          | 26.2±0.5c  | 16.1±0.2b  | 24.2±0.1ac         | 31.8±0.2d  |

n.d: not detected;

HB: hot-break tomato purees; CB: cold-break tomato purees; EVOO: virgin olive oil; HB-E<sub>t%</sub>-O<sub>m%</sub>: HB-EVOO-onion puree with t% EVOO and m% onion; CB-E<sub>t%</sub>-O<sub>m%</sub>: CB-EVOO-onion puree with t% EVOO and m% onion;

Data followed by different letters in the same column for same tomato matrix (HB or CB) are significantly different ( $p < 0.05$ , Dunn test).

Table S3. Proportions (%) and bioaccessibilities (%) of phytoene (PT) and phytofluene (PTF) isomers in sale sauces (sale-h and sale-nh)

|            |         | Z1-PT    | 15Z-PT    | all- <i>E</i> -PT | Z2,3-PTF  | Z4-PTF    | all- <i>E</i> -PTF | Z5-PTF    |
|------------|---------|----------|-----------|-------------------|-----------|-----------|--------------------|-----------|
| P(sauce)   | Sale-h  | 2.9±0.1a | 81.8±0.1a | 15.3±0.1a         | 26.3±0.1a | 15.7±0.0a | 22.2±0.1a          | 35.9±0.1a |
|            | Sale-nh | 3.9±0.1b | 82.9±0.2b | 13.2±0.0b         | 28.1±0.1b | 14.7±0.0b | 22.1±0.2a          | 35.1±0.2b |
| P(micelle) | Sale-h  | n.d      | 86.4±0.2a | 13.6±0.2a         | 29.0±0.1a | 16.2±0.2a | 22.2±0.3a          | 32.6±0.3a |
|            | Sale-nh | n.d      | 86.9±0.2b | 13.1±0.2b         | 31.3±0.5b | 15.2±0.1b | 21.8±0.2b          | 31.7±0.3b |
| BioA       | Sale-h  | n.d      | 23.9±3.1a | 20.8±2.4a         | 19.8±3.1a | 18.4±2.7a | 18.0±2.9a          | 16.3±2.4a |
|            | Sale-nh | n.d      | 13.7±3.0b | 13.5±3.0b         | 11.8±2.9b | 11.0±2.9b | 10.5±2.8b          | 9.6±2.5b  |

n.d: not detected;

P(sauce): Proportions (%) of phytoene (PT) and phytofluene (PTF) isomers in sale sauces;

P(micelle): Proportions (%) of phytoene (PT) and phytofluene (PTF) isomers in micelle phases;

BioA: Bioaccessibilities (%) of phytoene (PT) and phytofluene (PTF) isomers.

Data followed by different letters in the same column are significantly different ( $p < 0.05$ , Kruskal-Wallis test).

Table S4. Proportion (%) of phytoene (PT) and phytofluene (PTF) in the micelle from jejunal phase of tomato-based sauces

| Sauces                                 | PT         |                   | PTF        |           |                    |            |
|----------------------------------------|------------|-------------------|------------|-----------|--------------------|------------|
|                                        | 15-Z-PT    | all- <i>E</i> -PT | Z 2,3-PTF  | Z 4-PTF   | all- <i>E</i> -PTF | Z 5-PTF    |
| HB-E <sub>2.5%</sub>                   | 97.7±0.2a  | 2.3±0.2a          | 82.9±0.5a  | n.d       | 17.1±0.5a          | n.d        |
| HB-E <sub>2.5%</sub> -O <sub>5%</sub>  | 94.6±0.1ab | 5.4±0.1ab         | 51.5±0.0ab | 3.8±0.3a  | 33.5±0.2b          | 11.2±0.4a  |
| HB-E <sub>2.5%</sub> -O <sub>10%</sub> | 92.4±0.1ab | 7.6±0.1ab         | 41.0±0.1ab | 8.7±0.1ab | 32.2±0.0ab         | 18.2±0.1ab |
| HB-E <sub>2.5%</sub> -O <sub>20%</sub> | 88.7±0.2b  | 11.3±0.2b         | 34.4±0.3b  | 15.8±0.2b | 25.7±0.1ab         | 24.1±0.3b  |
| CB-E <sub>2.5%</sub>                   | 97.4±0.2a  | 2.6±0.2a          | 86.3±0.5a  | n.d       | 13.7±0.5a          | n.d        |
| CB-E <sub>2.5%</sub> -O <sub>5%</sub>  | 94.9±0.2ab | 5.1±0.2ab         | 55.7±0.4ab | 3.2±0.2a  | 31.3±0.0ab         | 9.8±0.2a   |
| CB-E <sub>2.5%</sub> -O <sub>10%</sub> | 92.9±0.2ab | 7.1±0.2ab         | 45.0±0.4ab | 6.7±0.2ab | 32.5±0.2b          | 15.8±0.4ab |
| CB-E <sub>2.5%</sub> -O <sub>20%</sub> | 90.4±0.4b  | 9.6±0.4b          | 37.8±0.5b  | 11.6±0.4b | 29.6±0.3ab         | 21.1±0.4b  |

n.d: not detected;

HB: hot-break tomato purees; CB: cold-break tomato purees; EVOO: virgin olive oil; HB-E<sub>t%</sub>-O<sub>m%</sub>: HB-EVOO-onion puree with t% EVOO and m% onion; CB-E<sub>t%</sub>-O<sub>m%</sub>: CB-EVOO-onion puree with t% EVOO and m% onion;

Data followed by different letters in the same column for same tomato matrix (HB or CB) are significantly different ( $p < 0.05$ , Dunn test).
